# Supplementary material for: Inframe insertion and splice site variants in MFGE8 associate with protection against coronary atherosclerosis
Source: PubMed Central journal article supplement (PMC9385630; doi:10.1038/s42003-022-03552-0), 2022-08-17
Supplement: 42003_2022_3552_MOESM1_ESM.pdf [file 42003_2022_3552_MOESM1_ESM.pdf]

# Supplementary material

## Supplementary Note 1: Definition of the disease endpoints

Detailed definition for the endpoints that are discussed in this study: coronary atherosclerosis, myocardial infarction (only main diagnoses accepted), ischemic heart diseases, coronary revascularization, statin medication and major coronary heart disease event.

**Coronary atherosclerosis:** Coronary atherosclerosis was defined as underlying or direct cause of death or as the main or side diagnosis at hospital discharge with ICD codes I24, I25, Z951 and T822 (ICD-10) or 414 and 9960A (ICD-9) or 414 (ICD-8). Samples with ICD code I253 (ICD-10) as underlying or direct cause of death or as the main or side diagnosis at hospital discharge were excluded from the cases. Samples with ischemic heart diseases (defined as underlying or direct cause of death or as the main diagnosis at hospital discharge with ICD codes I20-25 in ICD10) were removed from controls.

**Myocardial infarction (strict definition):** Myocardial infarction was defined as underlying or direct cause of death or as the main diagnosis at hospital discharge with ICD codes I21 and I22 (ICD-10) or 410 (ICD-9 and 8). Samples with ICD codes I2190, I2197, I2290 or I2297 (ICD-10) as underlying or direct cause of death or as the main diagnosis at hospital discharge were excluded from the cases.

Samples with ischemic heart diseases (defined as underlying or direct cause of death or as the main diagnosis at hospital discharge with ICD codes I20-25 in ICD10) were removed from controls.

**Ischemic heart diseases:** Ischemic heart diseases was defined as the main or side diagnosis at hospital discharge with ICD codes I20-25 (ICD-10), 410-414 (ICD-9 and 8) or as underlying or direct cause of death with ICD codes I21-25, I46, R96 or R98 (ICD-10), 410-414 or 798 (ICD-9 and 8). Samples with underlying or direct cause of death with ICD code 7980A were removed from cases.

**Coronary revascularization:** Coronary revascularization was defined as either coronary angioplasty or coronary artery bypass grafting with Samples with ischemic heart diseases (defined as underlying or direct cause of death or as the main diagnosis at hospital discharge with ICD codes I20-25 in ICD-10) were removed from controls.

**Statin medication:** Statin medication was defined as at least three prescription medicine purchases with ATC class C10AA.

**Major coronary heart disease event:** Major coronary heart disease event was defined as the main diagnosis at hospital discharge with ICD codes I200, I21 and I22 (ICD-10) or 410 and 411 (ICD-9 and 8) or direct cause of death with ICD codes I21-I25, I46m R96 or R98 (ICD-10) or 410-414 or 798 (ICD-9 and 8). Samples with direct cause of death with ICD 7980A (ICD9) were excluded from cases.

# Supplementary figures

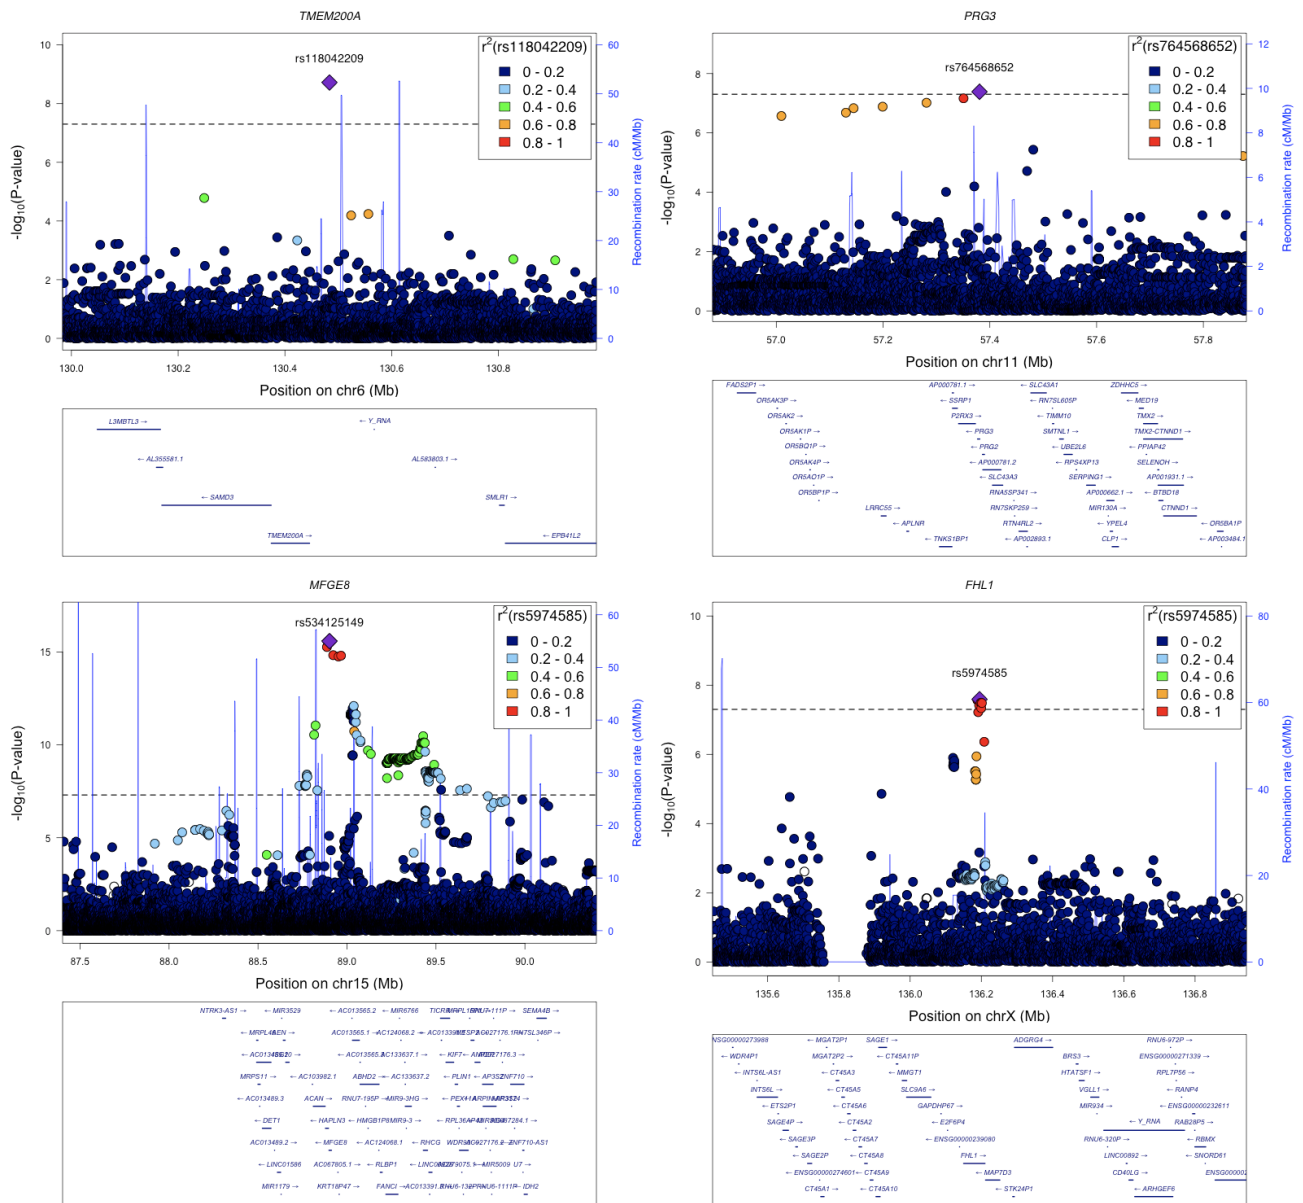

**Supplementary Figure 1: Locus zoom plots for the 4 previously unreported loci for CVD-related endpoints.**

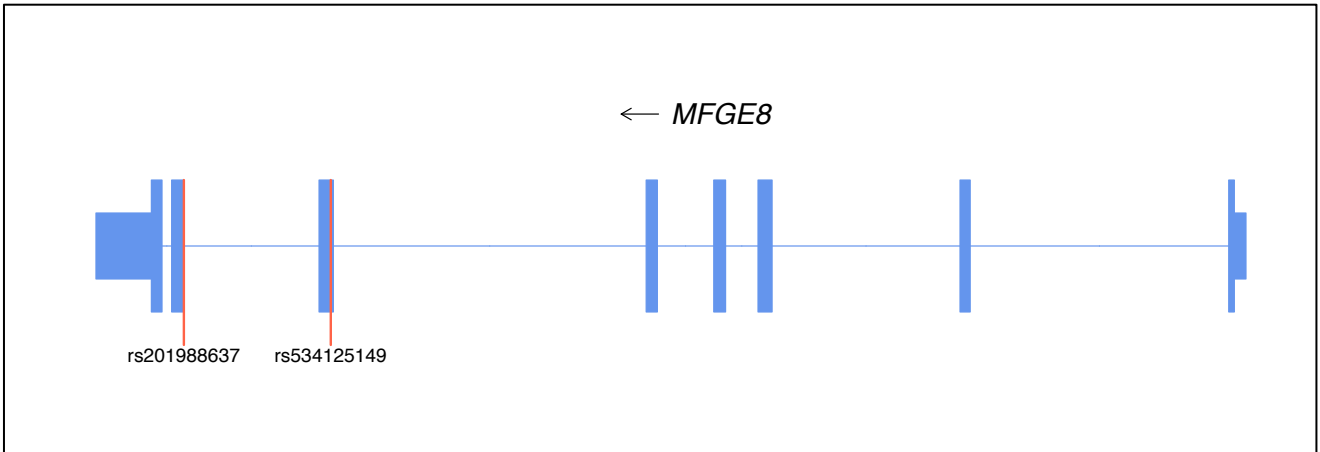

**Supplementary Figure 2:** *MFGE8* gene structure, inframe insertion (rs534125149) and splice acceptor variant (rs201988637) highlighted. Data extracted from UCSC browser (<https://genome.ucsc.edu>).

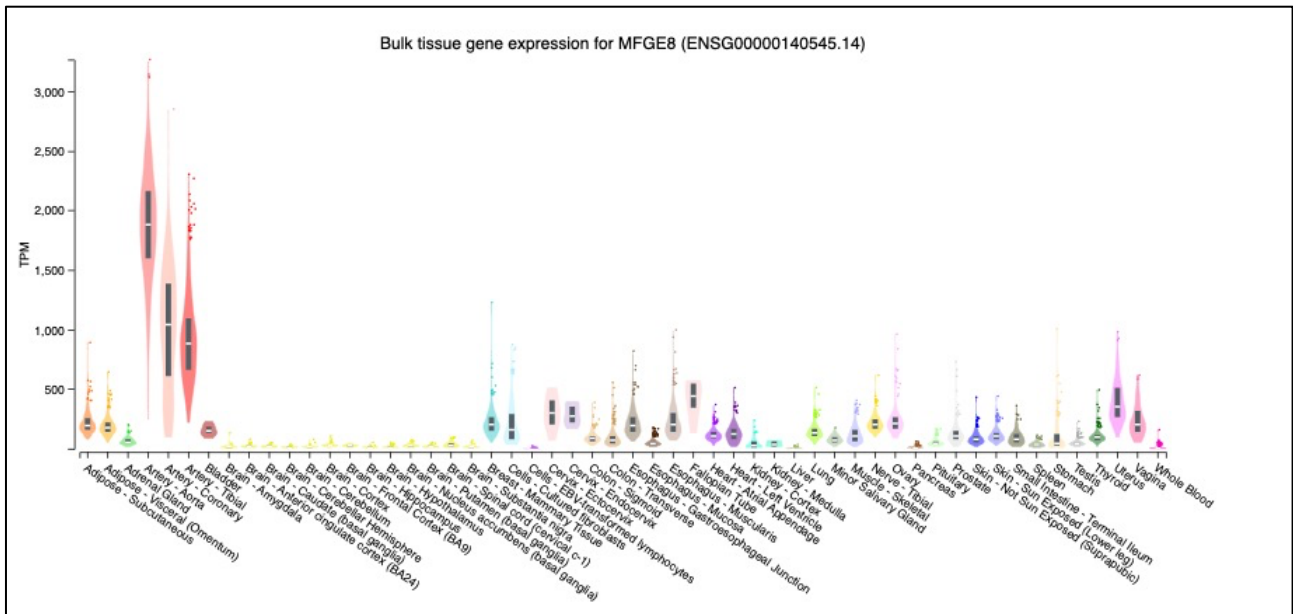

**Supplementary Figure 3:** Gene expression for MFGE8 gene (Figure from GTEX v8 browser: <https://gtexportal.org/home/gene/MFGE8>). Boxplots are shown as median and 25<sup>th</sup> and 75<sup>th</sup> percentiles, and points are displayed as outliers if they are above or below 1.5 times the interquartile range.

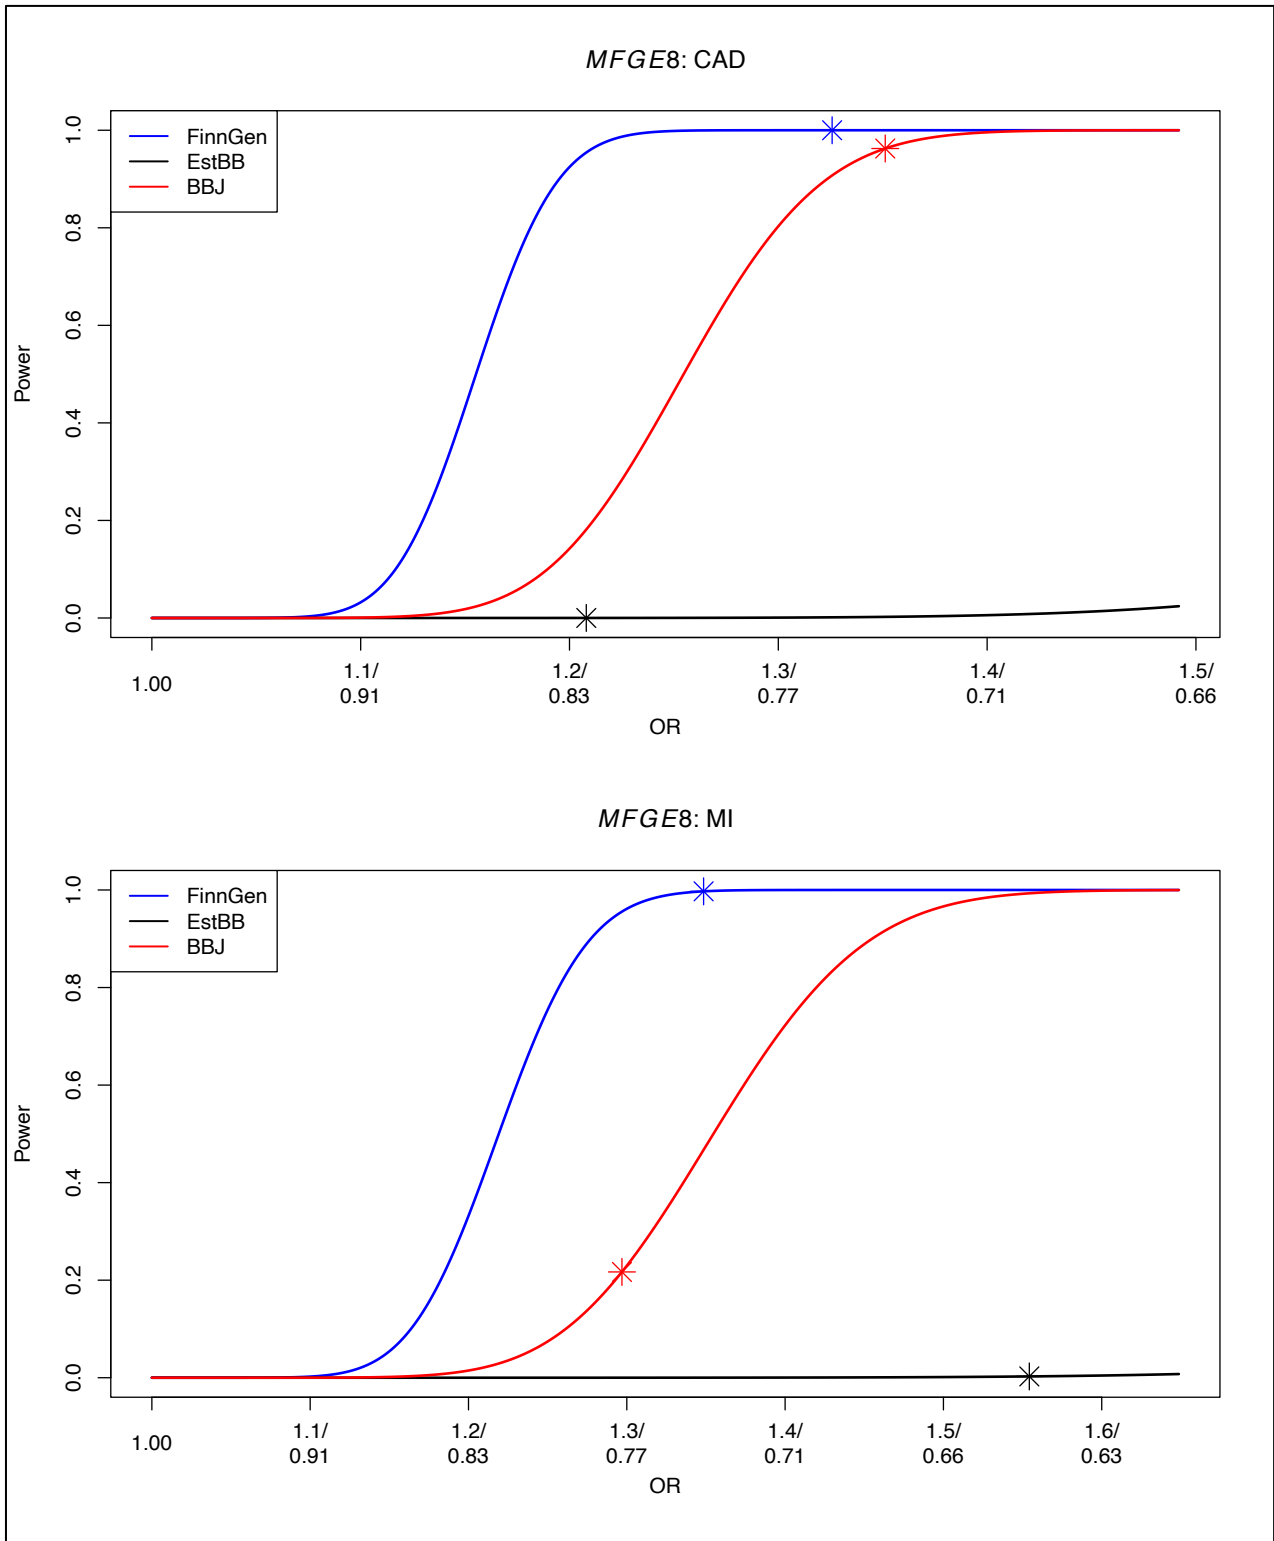

**Supplementary Figure 4 (legend):** Post hoc power calculations for rs534125149. Power was calculated as a function of effect size for each cohort scenario ( $N$  cases and controls, AF). The actual effect sizes are marked as stars.

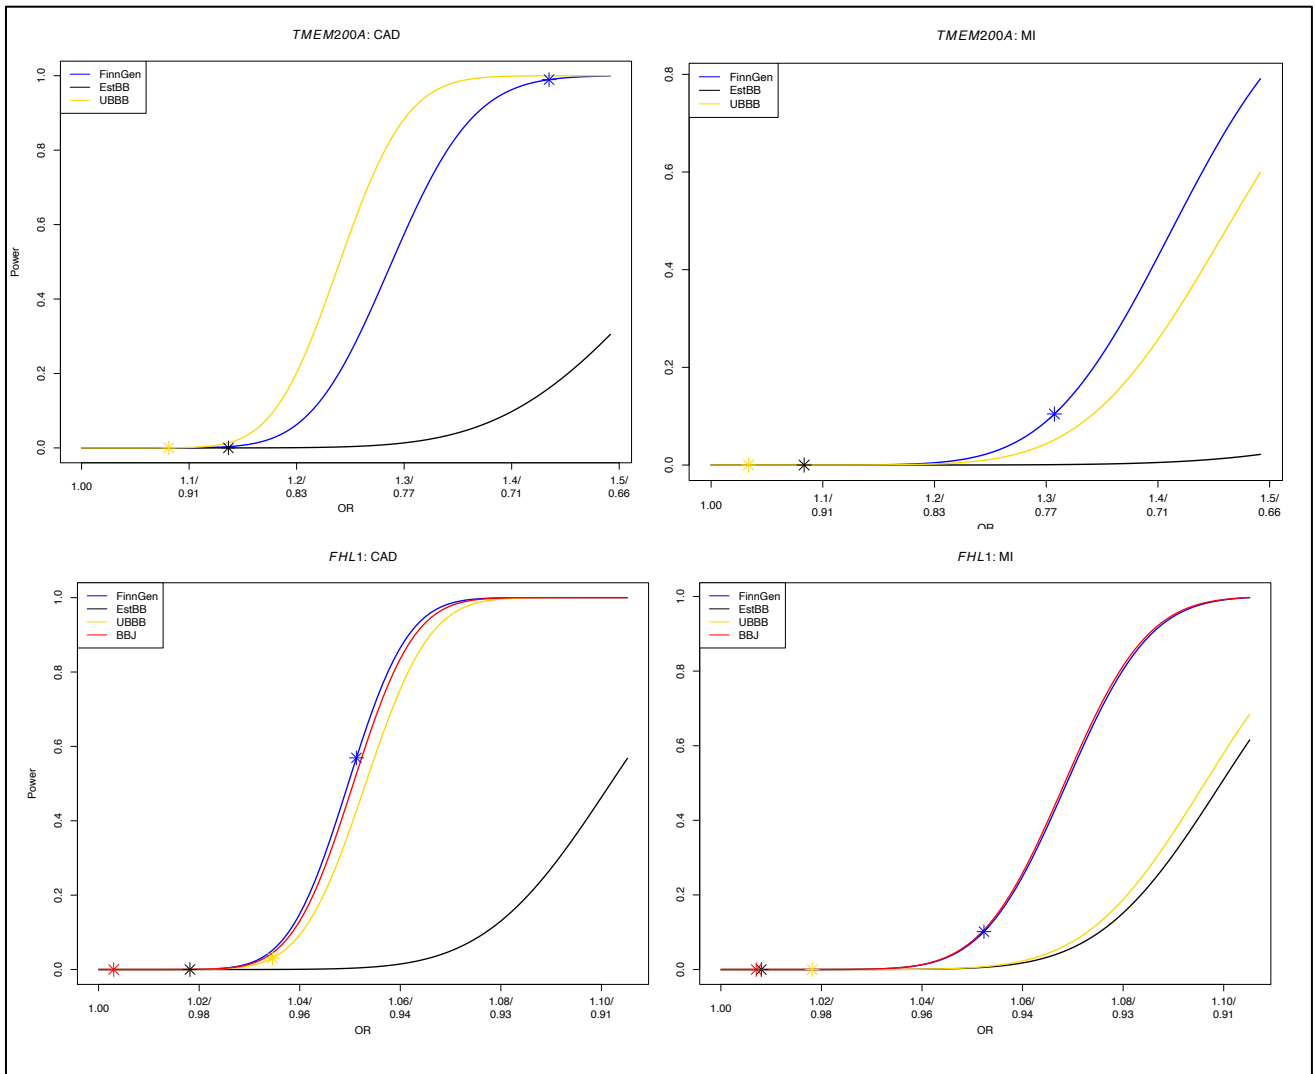

**Supplementary Figure 5 (legend):** Post hoc power calculations for rs118042209 in *TMEM200A* and rs5974585 in *FHL1*. Power was calculated as a function of effect size for each cohort scenario ( $N$  cases and controls, AF). The actual effect sizes are marked as stars.

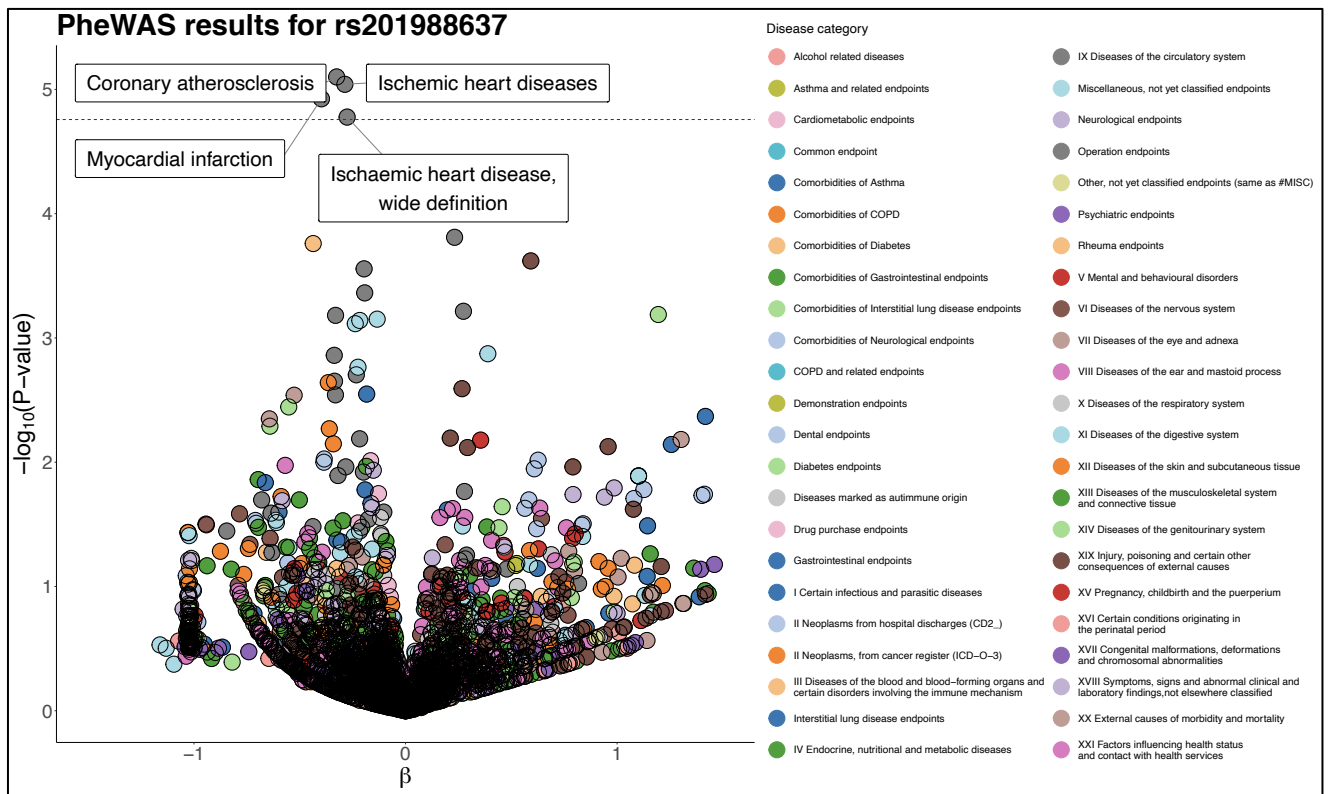

**Supplementary Figure 6:** Phenome-wide association study (PheWAS) results for rs201988637. Total number of endpoints is 2 861. Dashed line represents the phenome-wide significance threshold, multiple testing corrected by the number of endpoints =  $0.05/2\ 861 = 1.75 \times 10^{-5}$ . All endpoints reaching that threshold are labelled.



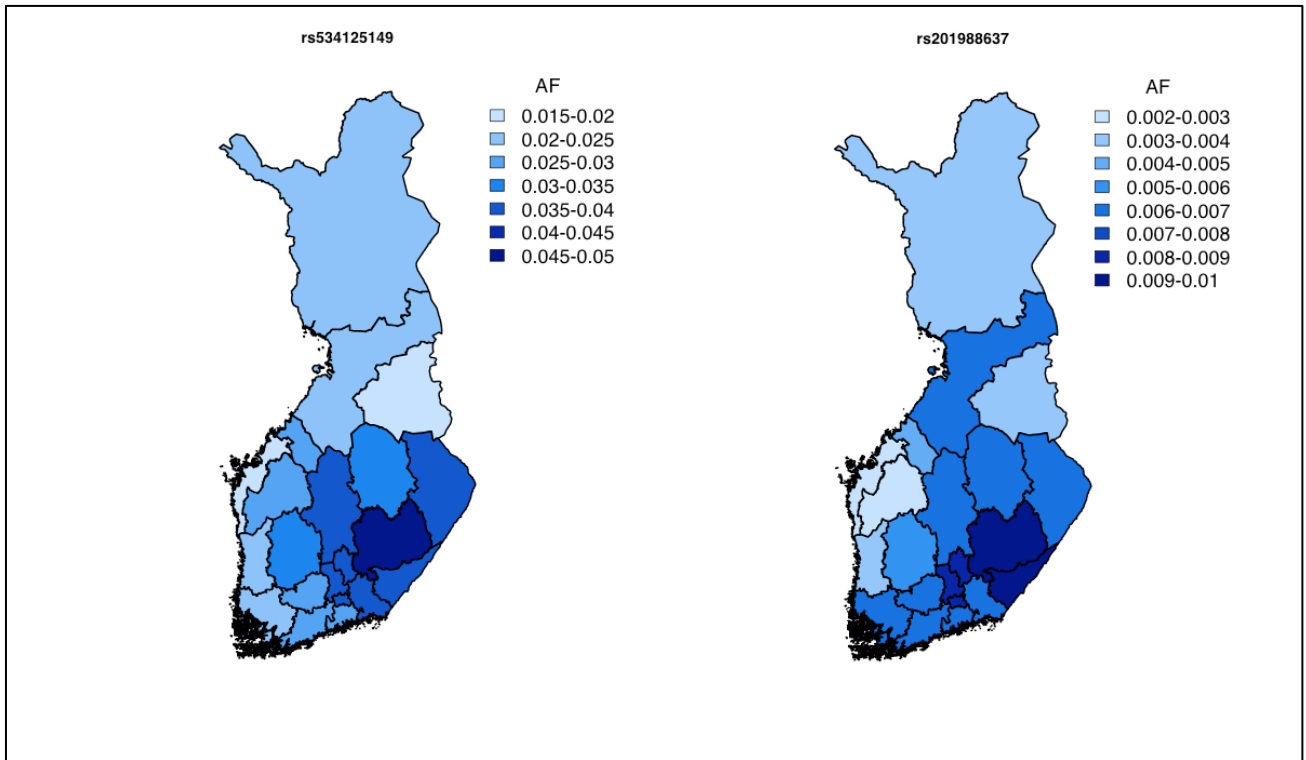

**Supplementary Figure 7:** Distribution of rs534125149 (inframe insertion) and rs201988637 (splice acceptor variant) across Finland.

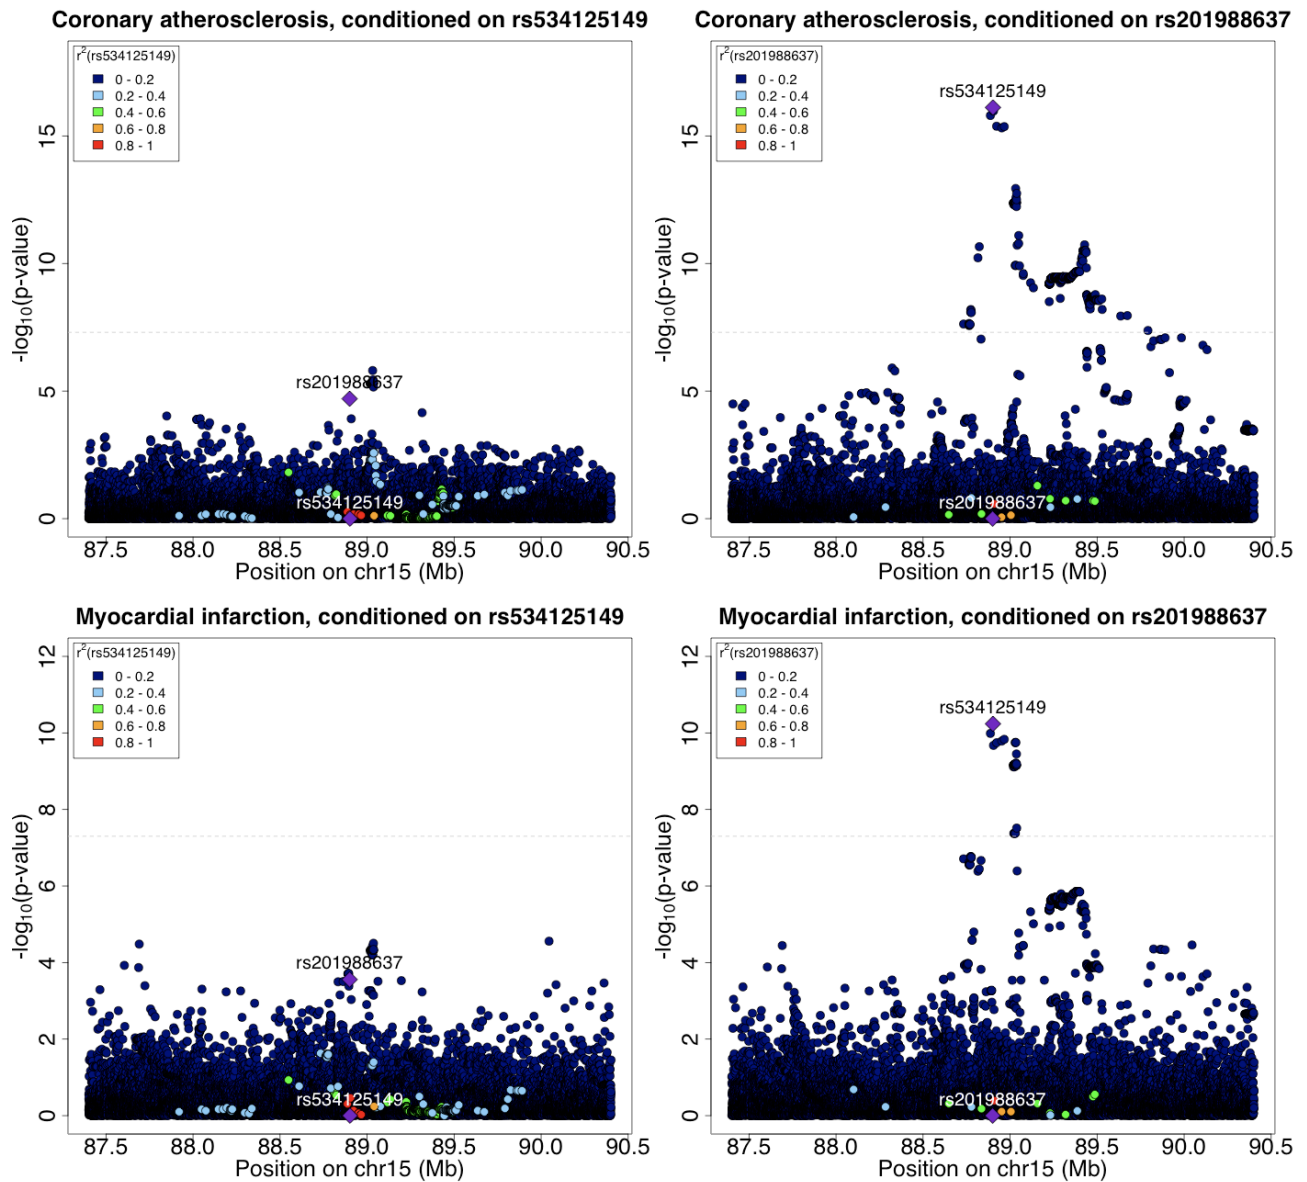

**Supplementary Figure 8:** Locus zoom plots from conditional analysis on rs534125149 and rs201988637 for coronary atherosclerosis and myocardial infarction (strict definition) on  $\pm 1.5$  Mb region around rs534125149.

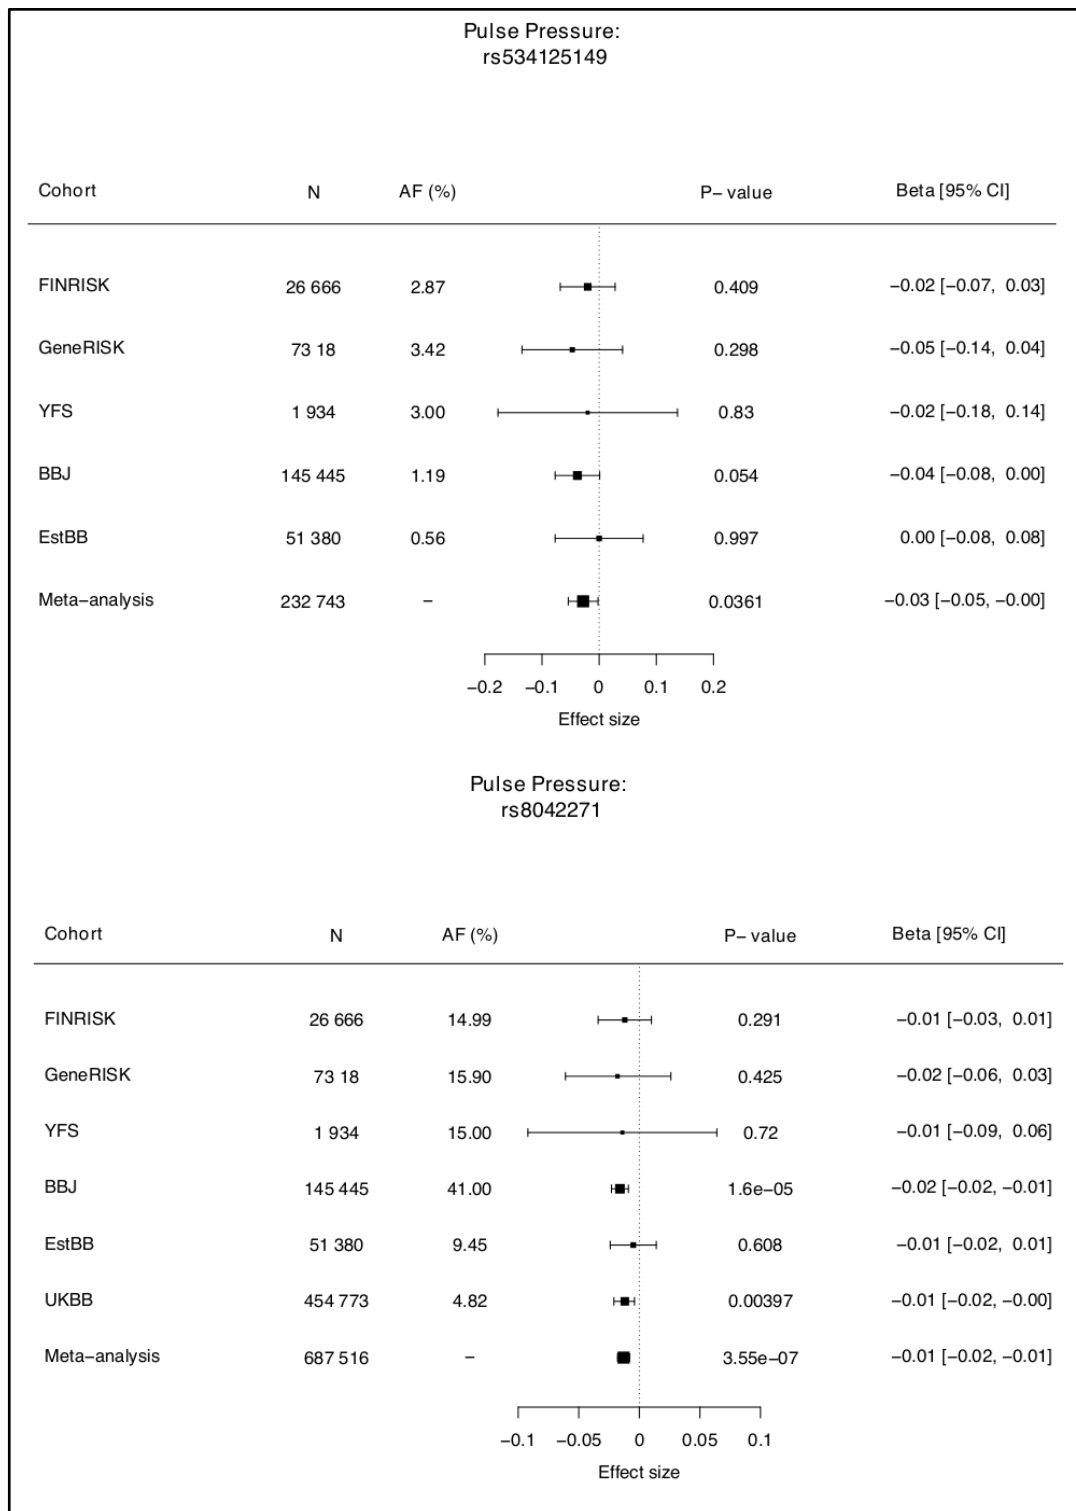

**Supplementary Figure 9:** Pulse pressure association results for inframe insertion rs534125149 and common variant rs8042271 across all cohorts, where variants were available. Size of the boxes represent the sample size of the cohorts, and the lines the 95%- confidence interval. The associations were tested using linear regression and adjusting for age and sex. Pulse pressure phenotypes were inverse-rank-normalised prior analysis.

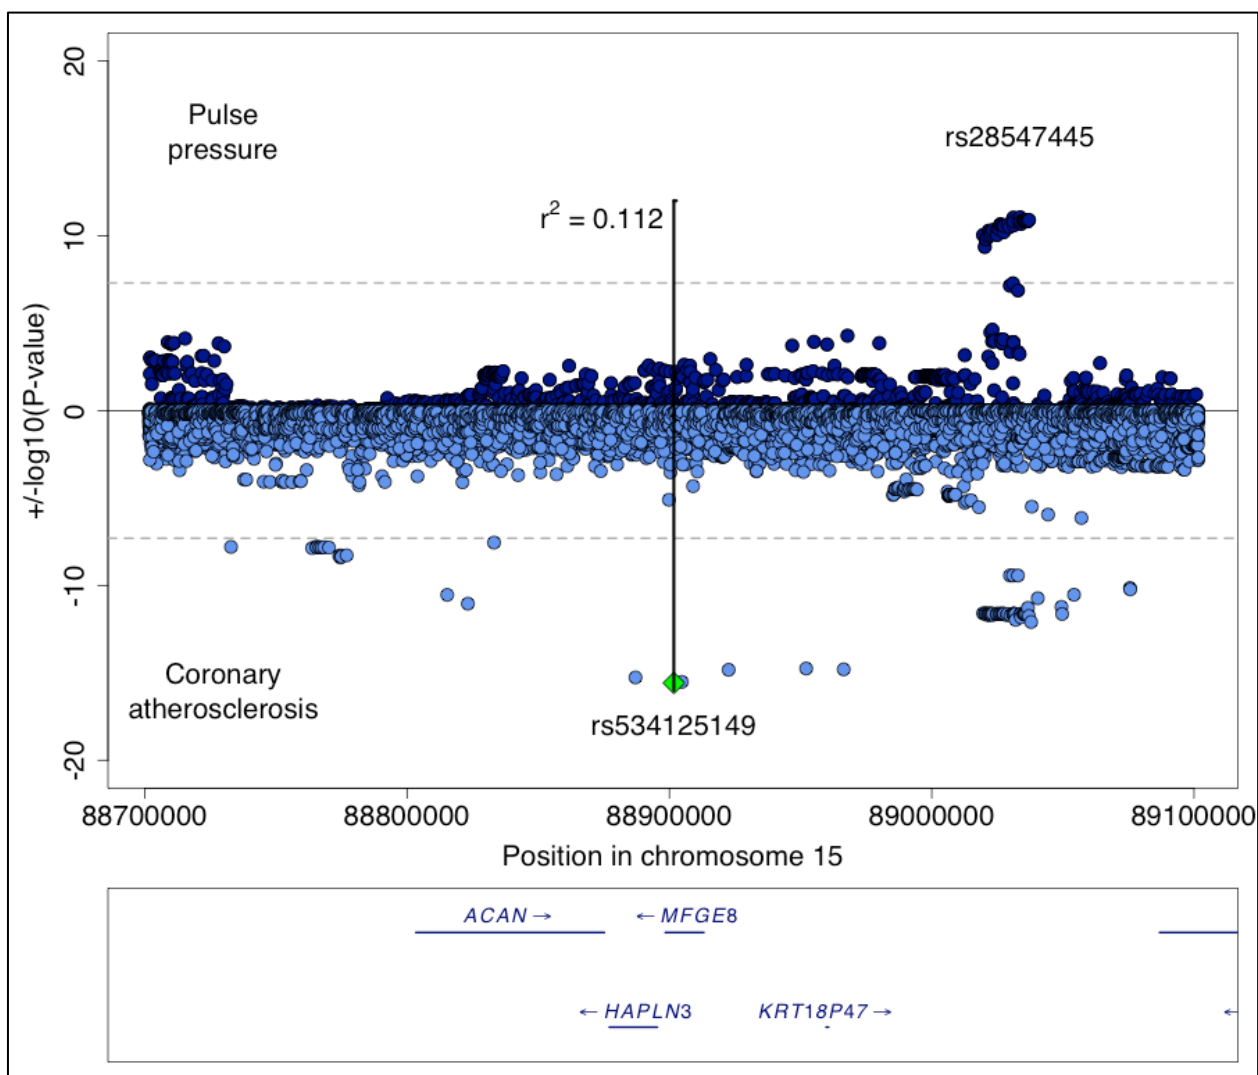

**Supplementary Figure 10:** LocusZoom plot for pulse pressure (from Evangelou et al., 2018) and coronary atherosclerosis in FinnGen in  $\pm 200$  kb region around rs534125149.

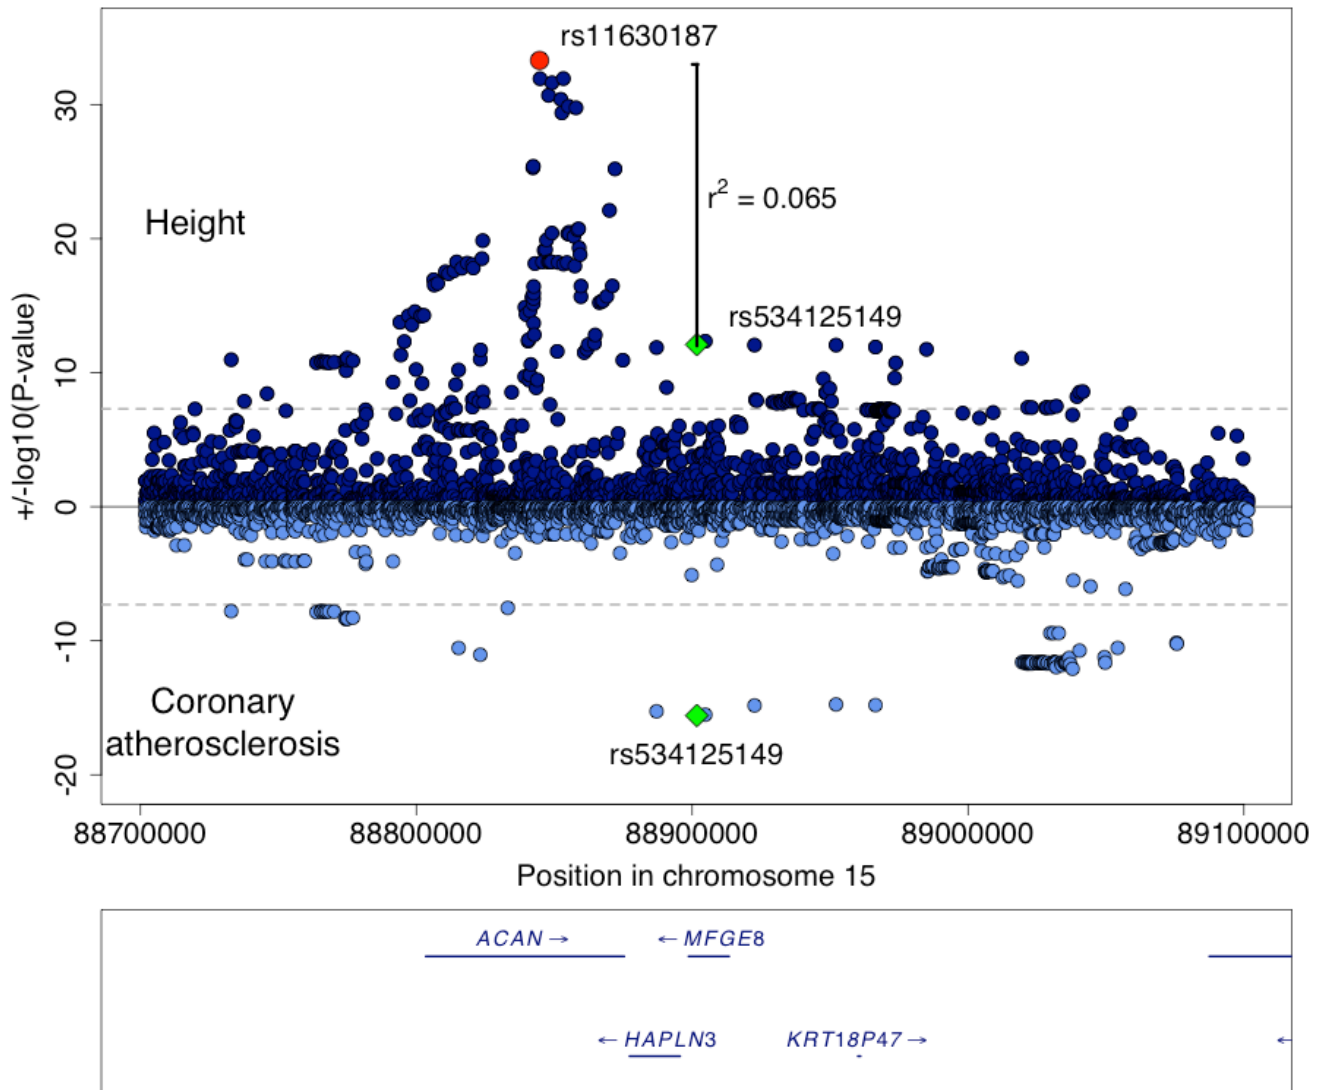

**Supplementary Figure 11:** LocusZoom plot for height and coronary atherosclerosis in  $\pm 200$  kb region around rs534125149.

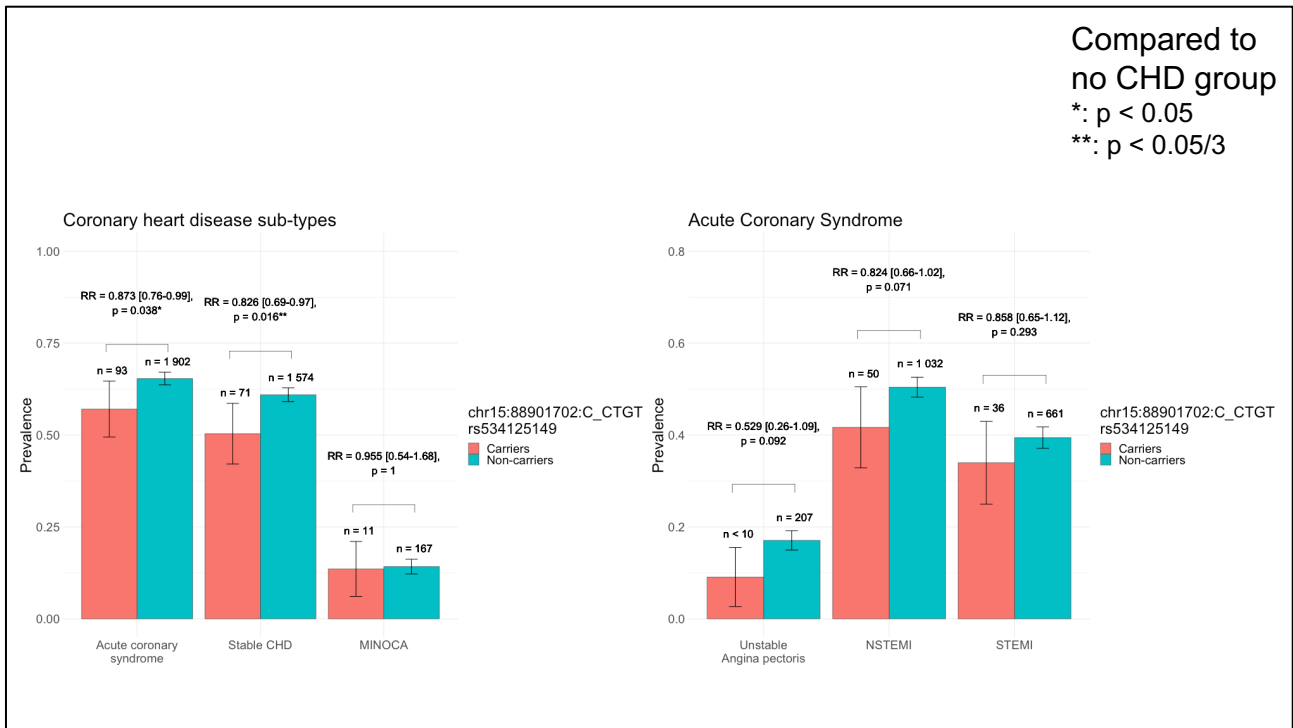

**Supplementary Figure 12:** Association of rs534125149 with sub-types of coronary heart disease and acute coronary syndrome in Corogene cohort. Comparison group is always no-CHD group ( $n = 1\ 008$  non-carriers and 70 carriers). The height of the bars represents the frequency of the carriers and non-carriers in each disease status group, and the error bars represents the 95 % confidence intervals. P- values are from  $\chi^2$  – test, calculated for each disease group against no CHD group. Source data for the figure is in Supplementary Data 1.

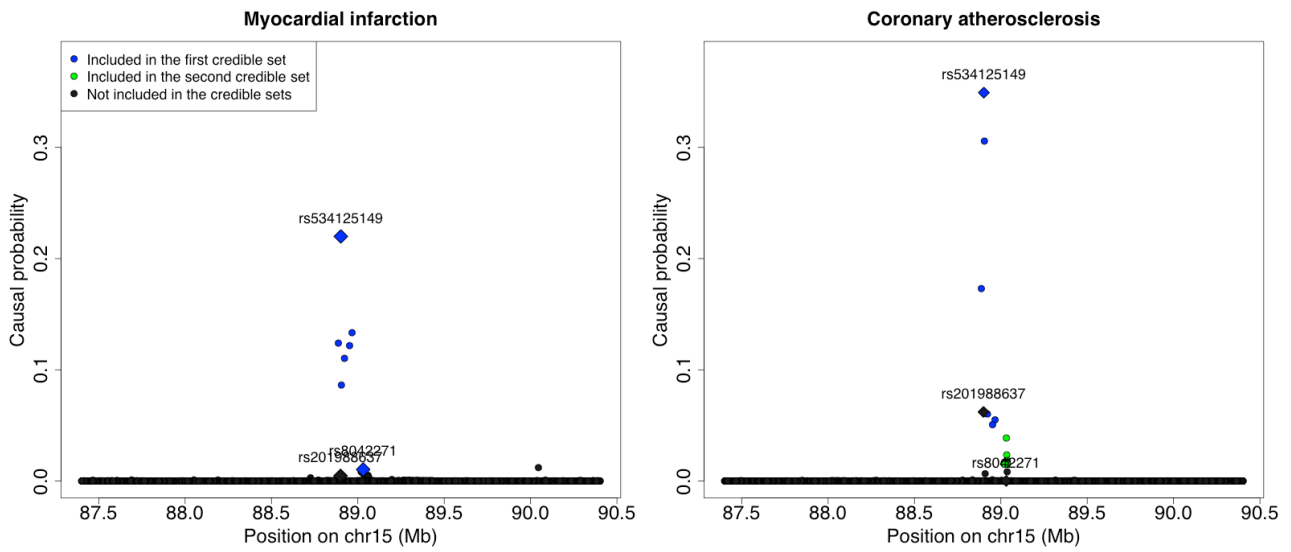

**Supplementary Figure 13:** Locus zoom plots from FINEMAP analyses for myocardial infarction and coronary atherosclerosis in FinnGen R6. On the x-axis are genomic positions in build hg38, and on the y-axis the probability for being causal for each variant.

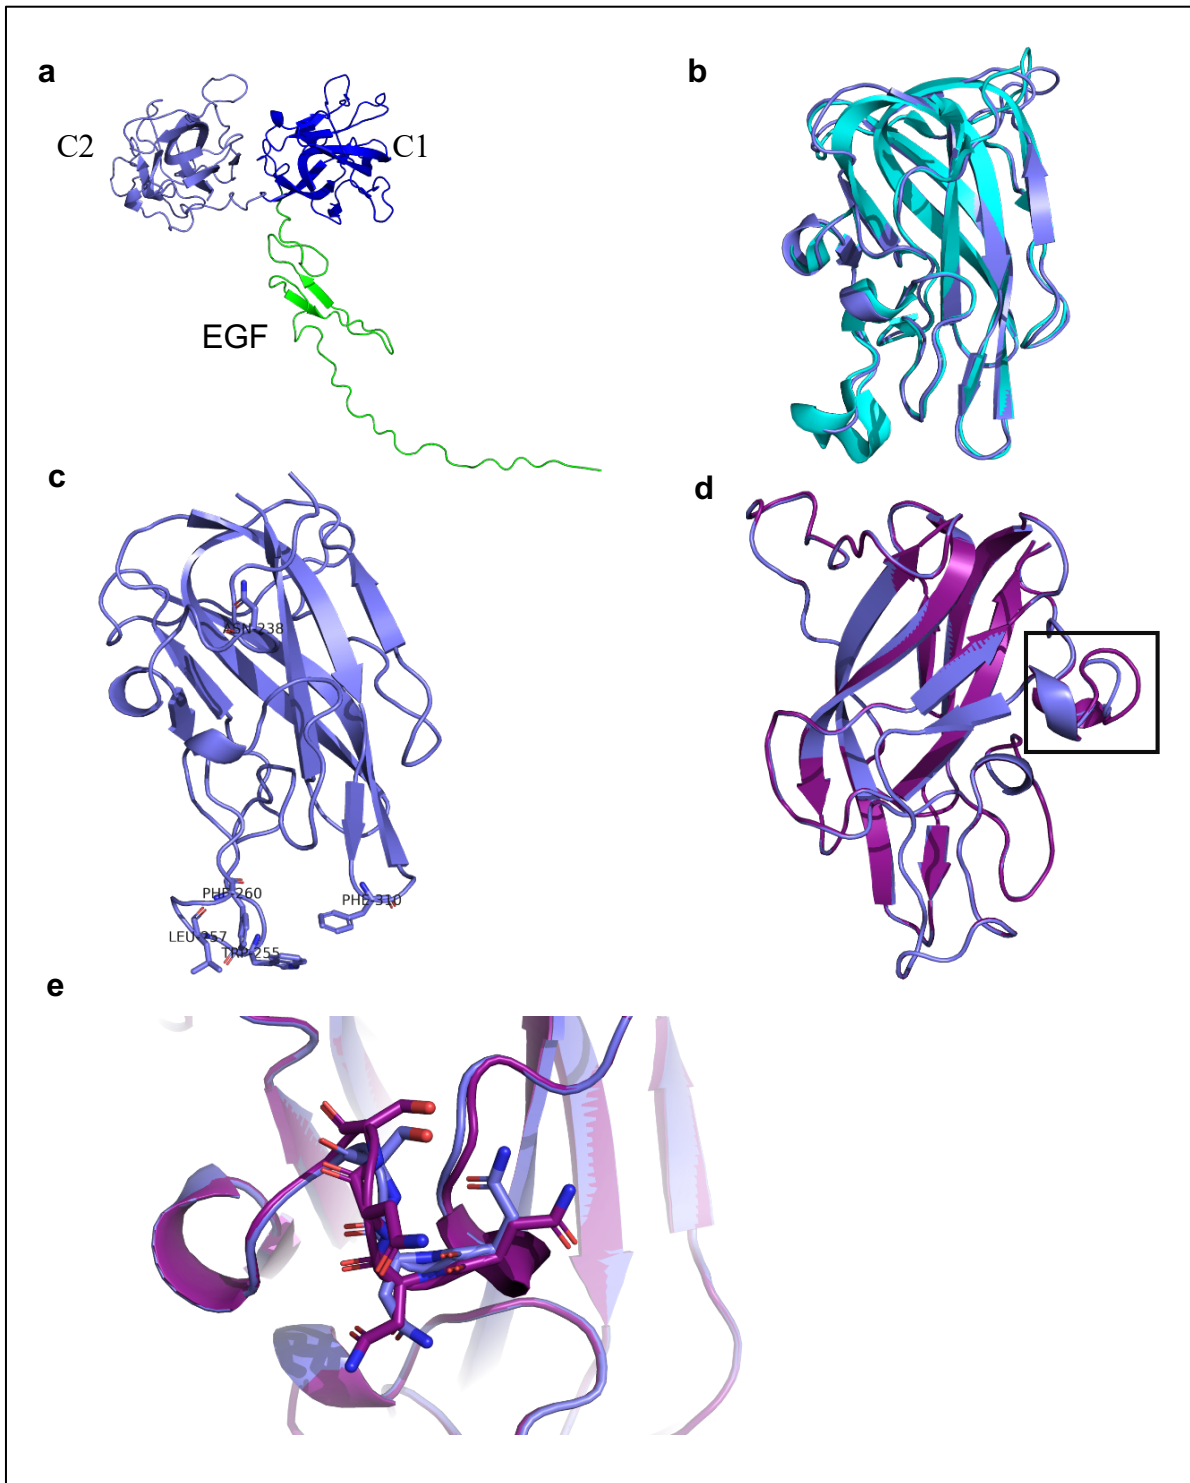

**Supplementary Figure 14:** Protein modelling results for inframe insertion rs534125149. A) Predicted structure from AlphaFold of lactadherin containing EGF, C1, and C2 domains. B) Comparison of the predicted lactadherin C2 domain (blue) with the C2 domain of bovine lactadherin from x-ray crystallography (cyan, PDB ID: 2PQS). C) The loop containing the insertion variant (Asn238 reference shown) is ~20Å away from the loops participating in membrane binding. D) The predicted structure of the Asn insertion variant is shown in purple with the reference lactadherin structure shown in blue. Predicted conformational changes are localized to a single loop region. E) Comparison of the side chains in the predicted structure of the reference and Asn insertion lactadherin variant. Amino acids Asn238 to Ser240 are shown in blue. The Asn insertion variant is shown in purple



## Supplementary tables

**Supplementary Table 1: 38 independent GWS associations for coronary atherosclerosis represented by the top variant. Previously unreported loci for CAD are bolded.**

| SNPID<br>(chr.pos.ref.alt)   | rsid                       | Most severe<br>consequence               | Gene                   | CAD<br>locus | Associated<br>CAD- related<br>trait(s) | FIN<br>enrichment | AF             | OR (P-value)                        |
|------------------------------|----------------------------|------------------------------------------|------------------------|--------------|----------------------------------------|-------------------|----------------|-------------------------------------|
| chr9:22099569:C:A            | rs1537371                  | Intron variant                           | <i>CDKN2B-AS1</i>      | Yes          | CAD, CHD                               | 0.8               | 0.42           | 1.25 (2.30×10 <sup>-87</sup> )      |
| chr6:12903725:A:G            | rs9349379                  | Intron variant                           | <i>PHACTR1</i>         | Yes          | CAD, CHD                               | 1.11              | 0.45           | 1.15 (9.00×10 <sup>-33</sup> )      |
| chr6:160589086:A:G           | rs10455872                 | Intron variant                           | <i>LPA</i>             | Yes          | Lp(a), CAD, LDL-C                      | 0.41              | 0.05           | 1.36 (6.70×10 <sup>-30</sup> )      |
| chr15:78750846:T:TAG         | rs10625725                 | Upstream gene<br>variant                 | <i>ADAMTS7</i>         | Yes          | CHD, DBP,<br>CAC                       | 0.842             | 0.64           | 0.9 (5.10×10 <sup>-19</sup> )       |
| chr1:55039974:G:T            | rs11591147                 | Missense variant                         | <i>PCSK9</i>           | Yes          | LDL-C, TC,<br>CAD, MI                  | 3.1               | 0.04           | 0.77 (4.10×10 <sup>-17</sup> )      |
| chr19:11087511:C:T           | rs17248720                 | Upstream gene<br>variant                 | <i>LDLR</i>            | Yes          | LDL-C, TC, CAD                         | 0.875             | 0.10           | 0.86 (2.00×10 <sup>-16</sup> )      |
| <b>chr15:88901702:C:CTGT</b> | <b>rs534125149</b>         | <b>Inframe<br/>insertion</b>             | <b><i>MFGE8</i></b>    | <b>NO</b>    | <b>-</b>                               | <b>inf</b>        | <b>0.03</b>    | <b>0.75 (2.60×10<sup>-16</sup>)</b> |
| chr4:147472512:C:T           | rs1878406                  | Intergenic<br>variant                    | <i>EDNRA</i>           | Yes          | PP, CAD                                | 0.963             | 0.13           | 1.15 (1.00×10 <sup>-15</sup> )      |
| chr1:109275684:G:T           | rs629301                   | 3 prime UTR<br>variant                   | <i>CELSR2</i>          | Yes          | LDL-C, TC, CAD                         | 0.989             | 0.79           | 1.12 (1.60×10 <sup>-15</sup> )      |
| chr19:44908822:C:T           | rs7412                     | Missense variant                         | <i>APOE</i>            | Yes          | CAD, LDL-C, TC                         | 0.561             | 0.05           | 0.83 (4.20×10 <sup>-14</sup> )      |
| chr14:99649135:C:T           | rs541148696                | Intron variant                           | <i>HHIPL1</i>          | Yes          | CAD, SBP, MI                           | 175               | 0.01           | 1.51 (9.80×10 <sup>-14</sup> )      |
| chr21:34221526:G:A           | rs28451064                 | Intron variant                           | <i>AP000317.1/2</i>    | Yes          | CAD                                    | 1.14              | 0.15           | 1.12 (1.20×10 <sup>-13</sup> )      |
| chr11:116752497:TA:T         | rs66505542,<br>rs398017699 | Intron variant                           | <i>BUD13</i>           | Yes          | TG, HDL-C, TC                          | 0.97              | 0.82           | 0.9 (4.80×10 <sup>-13</sup> )       |
| chr13:110397276:T:C          | rs9515203                  | Intron variant                           | <i>COL4A2</i>          | Yes          | CAD, LDL-C,                            | 1.01              | 0.26           | 0.91 (2.50×10 <sup>-12</sup> )      |
| chr12:111569952:C:T          | rs653178                   | Intron variant                           | <i>ATXN2</i>           | Yes          | BP, LDL-C, CAD                         | 1.16              | 0.58           | 0.92 (3.40×10 <sup>-12</sup> )      |
| chr1:56506681:G:A            | rs72664324                 | Intron variant                           | <i>PLPP3</i>           | Yes          | CAD, CHD, PP                           | 1.18              | 0.11           | 0.88 (7.30×10 <sup>-12</sup> )      |
| chr2:203206233:A:G           | rs72936353                 | Intron variant                           | <i>NBEAL1</i>          | Yes          | CAD                                    | 0.803             | 0.11           | 1.13 (3.40×10 <sup>-11</sup> )      |
| chr2:85532371:C:T            | rs59877521                 | Intergenic<br>variant                    | <i>MAT2A</i>           | Yes          | CAD                                    | 1.03              | 0.43           | 1.08 (1.30×10 <sup>-10</sup> )      |
| chr7:150993088:C:T           | rs3918226                  | Intron variant                           | <i>NOS3</i>            | Yes          | CAD                                    | 0.916             | 0.07           | 1.15 (1.70×10 <sup>-10</sup> )      |
| chr7:106770331:G:A           | rs12705390                 | Upstream gene<br>variant                 | <i>PIK3CG</i>          | Yes          | TG                                     | 1.54              | 0.30           | 1.08 (3.00×10 <sup>-10</sup> )      |
| chr17:2264939:C:T            | rs7209564                  | Intron variant                           | <i>SMG6</i>            | Yes          | CHD, SBP, BMI                          | 0.973             | 0.72           | 1.08 (4.00×10 <sup>-10</sup> )      |
| chr1:37950638:C:T            | rs72661887                 | Upstream gene<br>variant                 | <i>INPP5B</i>          | Yes          | SBP, PP                                | 1.24              | 0.54           | 1.07 (6.00×10 <sup>-10</sup> )      |
| chr3:138369222:G:C           | rs1199337                  | Intron variant                           | <i>MRAS</i>            | Yes          | CAFD CHD, BMI                          | 1                 | 0.14           | 1.11 (6.80×10 <sup>-10</sup> )      |
| chr20:45910063:C:A           | rs201557719                | Missense variant                         | <i>PLTP</i>            | Yes          | HDL-C, TG                              | inf               | 0.0023         | 2.01 (1.40×10 <sup>-09</sup> )      |
| <b>chr6:130483492:A:G</b>    | <b>rs118042209</b>         | <b>Intergenic<br/>variant</b>            | <b><i>TMEM200A</i></b> | <b>NO</b>    | <b>-</b>                               | <b>0.79</b>       | <b>0.01</b>    | <b>0.7 (1.90×10<sup>-09</sup>)</b>  |
| chr7:19013110:G:A            | rs57301765                 | Intergenic<br>variant                    | <i>TWIST1</i>          | Yes          | PP, CAD, SBP                           | 1.3               | 0.19           | 1.09 (2.10×10 <sup>-09</sup> )      |
| chr12:54120216:A:T           | rs11170821                 | Non coding<br>transcript exon<br>variant | <i>SMUG1</i>           | Yes          | CAD, BMI                               | 2.21              | 0.06           | 1.15 (2.40×10 <sup>-09</sup> )      |
| chr5:108716278:T:C           | rs6867978                  | Intergenic<br>variant                    | <i>FER</i>             | Yes          | SBP, PP                                | 0.854             | 0.29           | 0.93 (2.80×10 <sup>-09</sup> )      |
| chr12:57146968:C:G           | rs7968719                  | Intron variant                           | <i>LRP1</i>            | Yes          | CAD, BMI                               | 0.991             | 0.52           | 1.07 (3.50×10 <sup>-09</sup> )      |
| chr6:32204288:T:G            | rs1044506                  | Synonymous<br>variant                    | <i>NOTCH4</i>          | Yes          | BMI                                    | 1.01              | 0.87           | 1.1 (6.80×10 <sup>-09</sup> )       |
| chr6:133696717:G:A           | rs34537042                 | Intron variant                           | <i>EYA4</i>            | Yes          | TG, AF, WHR                            | 0.938             | 0.18           | 1.09 (7.50×10 <sup>-09</sup> )      |
| chr15:85610093:A:G           | rs16942194                 | Intron variant                           | <i>AKAP13</i>          | Yes          | SBP, PP, CAD                           | 2.09              | 0.10           | 0.9 (8.10×10 <sup>-09</sup> )       |
| chr4:41669720:A:T            | rs141987800                | Intron variant                           | <i>LIMCH1</i>          | Yes          | LDL-C, Statin<br>response              | 0.52              | 0.004          | 1.75 (9.40×10 <sup>-09</sup> )      |
| chr8:22172265:C:A            | rs73225841                 | Intron variant                           | <i>BMP1</i>            | Yes          | CAD                                    | 2.65              | 0.15           | 1.1 (1.20×10 <sup>-08</sup> )       |
| chr2:43845437:G:T            | rs4299376                  | Intron variant                           | <i>ABCG8</i>           | Yes          | LDL-C, TC, CAD                         | 1.16              | 0.78           | 0.93 (1.70×10 <sup>-08</sup> )      |
| <b>chrX:136194941:C:G</b>    | <b>rs5974585</b>           | <b>Intron variant</b>                    | <b><i>FHL1</i></b>     | <b>NO</b>    | <b>-</b>                               | <b>1.25</b>       | <b>0.99</b>    | <b>0.95 (2.55×10<sup>-08</sup>)</b> |
| chr8:125487789:C:G           | rs28601761                 | Intron variant                           | <i>TRIB1</i>           | Yes          | TG, HDL-C, MI                          | 1                 | 0.41           | 0.94 (2.60×10 <sup>-08</sup> )      |
| <b>chr11:57380633:A:G</b>    | <b>rs764568652</b>         | <b>Intron variant</b>                    | <b><i>PRG3</i></b>     | <b>NO</b>    | <b>-</b>                               | <b>inf</b>        | <b>0.00032</b> | <b>7.72 (4.10×10<sup>-08</sup>)</b> |

**Supplementary Table 2: Significant association results from the phenome-wide scan.**

Association results for rs534125149 and rs201988637 for 5 endpoints with p-value <  $1.75 \times 10^{-05}$  (PWS) for rs534125149, and with fundamental characteristics. Total number of PWS disease endpoint for rs53412514 was 14.

| Disease endpoint                                             | Cases / Controls   | rs534125149 (inframe insertion) |                        | rs201988637 (splice acceptor) |                        |
|--------------------------------------------------------------|--------------------|---------------------------------|------------------------|-------------------------------|------------------------|
|                                                              |                    | OR [95% CI]                     | P-value                | OR [95% CI]                   | P-value                |
| Coronary atherosclerosis                                     | 28 598/<br>222 551 | 0.75 [0.71-0.81]                | $2.63 \times 10^{-16}$ | 0.72 [0.63-0.83]              | $7.94 \times 10^{-06}$ |
| Coronary revascularization                                   | 14 741/<br>222 551 | 0.69 [0.63-0.76]                | $1.86 \times 10^{-15}$ | 0.72 [0.59-0.87]              | $6.58 \times 10^{-04}$ |
| Ischemic heart diseases                                      | 37 854/<br>222 551 | 0.80 [0.75-0.84]                | $4.26 \times 10^{-14}$ | 0.75 [0.66-0.85]              | $9.10 \times 10^{-06}$ |
| Major coronary heart disease event                           | 25 707/<br>234 698 | 0.79 [0.73-0.84]                | $1.12 \times 10^{-11}$ | 0.79 [0.68-0.92]              | $1.98 \times 10^{-03}$ |
| Myocardial infarction, strict (only main diagnoses accepted) | 14 305/<br>222 551 | 0.74 [0.68-0.81]                | $1.95 \times 10^{-11}$ | 0.69 [0.58-0.83]              | $9.62 \times 10^{-05}$ |
| Statin medication                                            | 86 466/<br>173 939 | 0.90 [0.86-0.94]                | $1.54 \times 10^{-05}$ | 1.01 [0.91-1.12]              | 0.82                   |

**Supplementary Table 3:** Results for sensitivity analysis for survival analysis on first even of MI. Cox- proportional hazards model has been used, and all the results are for binary variable carrier/ non- carrier for either inframe insertion rs534125149 or splice acceptor variant rs534125149.

| Covariates | HR [95 % CI]        | P- value               |
|------------|---------------------|------------------------|
| None       | 0.779 [0.725-0.838] | $1.16 \times 10^{-11}$ |
| Sex        | 0.774 [0.720-0.832] | $3.30 \times 10^{-12}$ |
| BMI        | 0.789 [0.728-0.854] | $5.40 \times 10^{-09}$ |
| T2D        | 0.771 [0.716-0.831] | $7.71 \times 10^{-12}$ |
| Statins    | 0.788 [0.733-0.847] | $8.71 \times 10^{-11}$ |
| Smoking    | 0.830 [0.749-0.919] | $3.38 \times 10^{-04}$ |
| All above  | 0.833 [0.742-0.935] | $1.99 \times 10^{-03}$ |

**Supplementary Table 4: Characteristics of variants in MFGE8.**

| Chr | Position <sup>a</sup> | Alleles<br>(Ref/Alt) | rsid        | Af<br>(alt) | Info  | Most severe<br>consequence | ld with<br>rs534125149 | ld with<br>rs201988637 | ld with<br>rs8042271 |
|-----|-----------------------|----------------------|-------------|-------------|-------|----------------------------|------------------------|------------------------|----------------------|
| 15  | 88901702              | C/CTGT               | rs534125149 | 0.029       | 0.990 | Inframe insertion          | 1                      | 0.0001                 | 0.1536               |
| 15  | 88899813              | T/G                  | rs201988637 | 0.006       | 0.986 | Splice acceptor<br>variant | 0.0001                 | 1                      | 0.0010               |
| 15  | 89030987              | G/A                  | rs8042271   | 0.148       | 0.988 | Intergenic variant         | 0.1536                 | 0.0010                 | 1                    |

<sup>a</sup> Positions are in build 38

**Supplementary Table 5: 95% credible set for myocardial infarction (strict definition) from FINEMAP. Inframe insertion (rs534125149) and previously known common variant (rs8042271) are bolded.**

| SNPID<br>(chr:pos:ref:alt)   | rsid               | Causal<br>probability | ld with<br>rs534125149 |
|------------------------------|--------------------|-----------------------|------------------------|
| <b>chr15:88901702:C:CTGT</b> | <b>rs534125149</b> | <b>0.250</b>          | <b>1.000</b>           |
| chr15:88966448:A:C           | rs12594129         | 0.156                 | 0.962                  |
| chr15:88952146:C:T           | rs150599388        | 0.141                 | 0.963                  |
| chr15:88887075:G:T           | rs565898017        | 0.136                 | 0.991                  |
| chr15:88922596:C:T           | rs117951873        | 0.125                 | 0.967                  |
| chr15:88904754:C:T           | rs191156695        | 0.089                 | 0.981                  |
| <b>chr15:89030987:G:A</b>    | <b>rs8042271</b>   | <b>0.003</b>          | <b>0.154</b>           |
| chr15:89032865:T:A           | rs56015348         | 0.003                 | 0.154                  |
| chr15:89029825:A:C           | rs2003967          | 0.003                 | 0.154                  |
| chr15:89037068:C:G           | rs2351254          | 0.002                 | 0.112                  |
| chr15:89034032:T:C           | rs8035408          | 0.002                 | 0.112                  |
| chr15:89036690:G:C           | rs7164299          | 0.002                 | 0.114                  |
| chr15:89026237:T:G           | rs4932463          | 0.002                 | 0.112                  |
| chr15:89026272:G:C           | rs4932208          | 0.002                 | 0.112                  |
| chr15:89028938:C:T           | rs1550476          | 0.002                 | 0.112                  |
| chr15:89022026:A:C           | rs1807214          | 0.002                 | 0.112                  |
| chr15:89023347:T:C           | rs730657           | 0.002                 | 0.112                  |
| chr15:89024863:C:A           | rs34166180         | 0.002                 | 0.112                  |
| chr15:89030984:A:G           | rs8023801          | 0.002                 | 0.112                  |
| chr15:89031951:T:C           | rs7162318          | 0.002                 | 0.112                  |
| chr15:89033730:T:C           | rs28547445         | 0.002                 | 0.112                  |
| chr15:89021271:A:T           | rs12592098         | 0.002                 | 0.112                  |
| chr15:89022834:C:T           | rs735836           | 0.002                 | 0.112                  |
| chr15:89022640:T:A           | rs735837           | 0.002                 | 0.112                  |
| chr15:89024874:A:AAAG        | rs10683082         | 0.002                 | 0.112                  |
| chr15:89024799:T:G           | rs9672658          | 0.002                 | 0.112                  |
| chr15:89026138:A:C           | rs4932207          | 0.002                 | 0.112                  |
| chr15:89027167:G:C           | rs28737395         | 0.002                 | 0.112                  |
| chr15:89026859:A:C           | rs8041298          | 0.002                 | 0.112                  |
| chr15:89027456:A:G           | rs12437794         | 0.002                 | 0.112                  |
| chr15:89027517:T:C           | rs7169670          | 0.002                 | 0.112                  |
| chr15:89027435:G:C           | rs7162610          | 0.002                 | 0.112                  |

**Supplementary Table 6:** 95% credible sets for coronary atherosclerosis. Inframe insertion variant (rs534125149) is bolded. The LD's with the lead variant (variant with highest probability of being causal) in each credible set are reported.

| Credible set 1               |                    |                |                            | Credible set 2           |                            |                |                      |
|------------------------------|--------------------|----------------|----------------------------|--------------------------|----------------------------|----------------|----------------------|
| SNPID<br>chr:pos:ref:alt     | rsid               | Causal<br>prob | ld with<br>rs5341251<br>49 | SNPID<br>chr:pos:ref:alt | rsid                       | Causal<br>prob | ld with<br>rs7162326 |
| <b>chr15:88901702:C:CTGT</b> | <b>rs534125149</b> | <b>0.318</b>   | <b>1.000</b>               | chr15:89031969:T:C       | rs7162326                  | 0.048          | 1.000                |
| chr15:88904754:C:T           | rs191156695        | 0.309          | 0.981                      | chr15:89034032:T:C       | rs8035408                  | 0.028          | 0.952                |
| chr15:88887075:G:T           | rs565898017        | 0.184          | 0.991                      | chr15:89037068:C:G       | rs2351254                  | 0.025          | 0.950                |
| chr15:88922596:C:T           | rs117951873        | 0.064          | 0.967                      | chr15:89033989:G:A       | rs8029102                  | 0.021          | 0.952                |
| chr15:88966448:A:C           | rs12594129         | 0.059          | 0.962                      | chr15:89030984:A:G       | rs8023801                  | 0.021          | 0.952                |
| chr15:88952146:C:T           | rs150599388        | 0.055          | 0.963                      | chr15:89031951:T:C       | rs7162318                  | 0.021          | 0.952                |
|                              |                    |                |                            | chr15:89035227:A:T       | rs8037109                  | 0.021          | 0.952                |
|                              |                    |                |                            | chr15:89033730:T:C       | rs28547445                 | 0.021          | 0.952                |
|                              |                    |                |                            | chr15:89031195:C:G       | rs2083459                  | 0.021          | 0.952                |
|                              |                    |                |                            | chr15:89031187:T:C       | rs2083458                  | 0.021          | 0.952                |
|                              |                    |                |                            | chr15:89026237:T:G       | rs4932463                  | 0.021          | 0.952                |
|                              |                    |                |                            | chr15:89026272:G:C       | rs4932208                  | 0.021          | 0.952                |
|                              |                    |                |                            | chr15:89028938:C:T       | rs1550476                  | 0.021          | 0.952                |
|                              |                    |                |                            | chr15:89025698:A:G       | rs4932206                  | 0.021          | 0.952                |
|                              |                    |                |                            | chr15:89035651:A:G       | rs7182265                  | 0.021          | 0.952                |
|                              |                    |                |                            | chr15:89035631:A:T       | rs7182131                  | 0.021          | 0.952                |
|                              |                    |                |                            | chr15:89031158:A:G       | rs2083457                  | 0.021          | 0.952                |
|                              |                    |                |                            | chr15:89031253:T:C       | rs2083460                  | 0.021          | 0.952                |
|                              |                    |                |                            | chr15:89031209:GT:G      | rs35590540                 | 0.021          | 0.952                |
|                              |                    |                |                            | chr15:89031714:T:TG      | rs35681620/<br>rs397714366 | 0.021          | 0.952                |
|                              |                    |                |                            | chr15:89026138:A:C       | rs4932207                  | 0.021          | 0.952                |
|                              |                    |                |                            | chr15:89035106:T:C       | rs8041247                  | 0.021          | 0.952                |
|                              |                    |                |                            | chr15:89035116:G:C       | rs8035119                  | 0.021          | 0.952                |
|                              |                    |                |                            | chr15:89035492:T:C       | rs6496549                  | 0.021          | 0.952                |
|                              |                    |                |                            | chr15:89024863:C:A       | rs34166180                 | 0.021          | 0.952                |
|                              |                    |                |                            | chr15:89036232:A:G       | rs12593383                 | 0.021          | 0.952                |
|                              |                    |                |                            | chr15:89035688:A:T       | rs7182288                  | 0.021          | 0.952                |
|                              |                    |                |                            | chr15:89024874:A:AAAG    | rs10683082                 | 0.021          | 0.952                |
|                              |                    |                |                            | chr15:89024799:T:G       | rs9672658                  | 0.021          | 0.952                |
|                              |                    |                |                            | chr15:89027167:G:C       | rs28737395                 | 0.021          | 0.952                |
|                              |                    |                |                            | chr15:89026859:A:C       | rs8041298                  | 0.021          | 0.952                |
|                              |                    |                |                            | chr15:89027456:A:G       | rs12437794                 | 0.021          | 0.952                |
|                              |                    |                |                            | chr15:89027435:G:C       | rs7162610                  | 0.021          | 0.952                |
|                              |                    |                |                            | chr15:89027517:T:C       | rs7169670                  | 0.021          | 0.952                |
|                              |                    |                |                            | chr15:89021727:T:C       | rs734780                   | 0.021          | 0.952                |
|                              |                    |                |                            | chr15:89022026:A:C       | rs1807214                  | 0.020          | 0.952                |
|                              |                    |                |                            | chr15:89021271:A:T       | rs12592098                 | 0.020          | 0.952                |
|                              |                    |                |                            | chr15:89022834:C:T       | rs735836                   | 0.020          | 0.952                |
|                              |                    |                |                            | chr15:89022640:T:A       | rs735837                   | 0.020          | 0.952                |
|                              |                    |                |                            | chr15:89023347:T:C       | rs730657                   | 0.020          | 0.952                |
|                              |                    |                |                            | chr15:89022255:C:T       | rs8037001                  | 0.020          | 0.952                |
|                              |                    |                |                            | chr15:89020702:T:C       | rs28731436                 | 0.020          | 0.952                |
|                              |                    |                |                            | chr15:89020713:A:G       | rs28735097                 | 0.020          | 0.952                |
|                              |                    |                |                            | chr15:89020231:C:G       | rs1985691                  | 0.020          | 0.952                |
|                              |                    |                |                            | chr15:89019583:C:G       | rs28687065                 | 0.020          | 0.951                |

**Supplementary Table 7:** Association results for inframe insertion rs534125149, splice acceptor variant rs201988637 and common variants rs8042271 and rs734780 in MFG8 discussed for coronary atherosclerosis and MI, both separately and all three variants in the same model. Logistic regression adjusted for age, sex, genotyping batch and PC1-10 have been applied.

| Endpoint                      | rsid        | SNPID<br>(chr:position:ref:alt) | Separately       |                        | All in same model |                        |
|-------------------------------|-------------|---------------------------------|------------------|------------------------|-------------------|------------------------|
|                               |             |                                 | OR [CI]          | P                      | OR [CI]           | P                      |
| <b>rs8042271</b>              |             |                                 |                  |                        |                   |                        |
| Coronary atherosclerosis      | rs534125149 | chr15:88901702:C:CTGT           | 0.76 [0.71-0.81] | 8.30×10 <sup>-17</sup> | 0.79 [0.74-0.85]  | 1.14×10 <sup>-10</sup> |
|                               | rs201988637 | chr15:88899813:T:G              | 0.76 [0.66-0.87] | 1.04×10 <sup>-4</sup>  | 0.75 [0.65-0.86]  | 4.41×10 <sup>-5</sup>  |
|                               | rs8042271   | chr15:89030987:G:A              | 0.91 [0.88-0.94] | 1.49×10 <sup>-10</sup> | 0.94 [0.91-0.97]  | 4.56×10 <sup>-4</sup>  |
| Myocardial Infarction, strict | rs534125149 | chr15:88901702:C:CTGT           | 0.74 [0.68-0.81] | 6.17×10 <sup>-11</sup> | 0.79 [0.72-0.88]  | 5.42×10 <sup>-6</sup>  |
|                               | rs201988637 | chr15:88899813:T:G              | 0.72 [0.59-0.87] | 6.66×10 <sup>-4</sup>  | 0.70 [0.57-0.85]  | 2.87×10 <sup>-4</sup>  |
|                               | rs8042271   | chr15:89030987:G:A              | 0.88 [0.84-0.91] | 1.82×10 <sup>-10</sup> | 0.91 [0.87-0.95]  | 2.30×10 <sup>-5</sup>  |
| <b>rs734780</b>               |             |                                 |                  |                        |                   |                        |
| Coronary atherosclerosis      | rs534125149 | chr15:88901702:C:CTGT           | 0.76 [0.71-0.81] | 8.30×10 <sup>-17</sup> | 0.80 [0.75-0.86]  | 2.83×10 <sup>-10</sup> |
|                               | rs201988637 | chr15:88899813:T:G              | 0.76 [0.66-0.87] | 1.04×10 <sup>-4</sup>  | 0.73 [0.64-0.84]  | 1.13×10 <sup>-5</sup>  |
|                               | rs734780    | chr15:89021727:T:C              | 0.90 [0.88-0.93] | 2.36×10 <sup>-12</sup> | 0.93 [0.91-0.96]  | 1.62×10 <sup>-6</sup>  |
| Myocardial Infarction, strict | rs534125149 | chr15:88901702:C:CTGT           | 0.74 [0.68-0.81] | 6.17×10 <sup>-11</sup> | 0.78 [0.71-0.86]  | 3.70×10 <sup>-7</sup>  |
|                               | rs201988637 | chr15:88899813:T:G              | 0.72 [0.59-0.87] | 6.66×10 <sup>-4</sup>  | 0.67 [0.58-0.83]  | 1.04×10 <sup>-4</sup>  |
|                               | rs734780    | chr15:89021727:T:C              | 0.89 [0.86-0.92] | 9.19×10 <sup>-10</sup> | 0.92 [0.88-0.95]  | 1.31×10 <sup>-5</sup>  |
